# Supplementary material
Source: PubMed Central journal article supplement (PMC3326207)
Supplement: NIHMS347794-supplement-01.pdf [file NIHMS347794-supplement-01.pdf]

**Supplementary Table 1.** The association between each of the 221 nucleotide excision repair single nucleotide polymorphisms (SNPs) studied and the risk of non-melanoma skin cancer.

| SNP        | P-value     | Odds Ratio | 95% Confidence Interval |
|------------|-------------|------------|-------------------------|
| rs2228527  | 0.001041688 | 1.57       | (1.20-2.05)             |
| rs2228529  | 0.001119038 | 1.57       | (1.20-2.05)             |
| rs17495770 | 0.002194386 | 1.68       | (1.20-2.34)             |
| rs4647709  | 0.00720726  | 0.59       | (0.40-0.87)             |
| rs4134822  | 0.025607628 | 2.69       | (1.13-6.40)             |
| rs4150530  | 0.031310164 | 0.67       | (0.47-0.97)             |
| rs4838518  | 0.031750663 | 1.26       | (1.02-1.57)             |
| rs876430   | 0.032735996 | 1.31       | (1.02-1.67)             |
| rs1264302  | 0.034996917 | 1.27       | (1.02-1.59)             |
| rs4253200  | 0.056640879 | 1.66       | (0.99-2.80)             |
| rs17494629 | 0.058445961 | 1.30       | (0.99-1.71)             |
| rs1951543  | 0.068341657 | 1.33       | (0.98-1.81)             |
| rs158572   | 0.069955511 | 0.82       | (0.66-1.02)             |
| rs3793552  | 0.070836611 | 1.48       | (0.97-2.28)             |
| rs999484   | 0.075074362 | 0.78       | (0.60-1.03)             |
| rs3093816  | 0.080013718 | 0.83       | (0.67-1.02)             |
| rs916920   | 0.088865537 | 0.79       | (0.60-1.04)             |
| rs4150351  | 0.096073464 | 1.26       | (0.96-1.66)             |
| rs274883   | 0.117031734 | 0.80       | (0.60-1.06)             |
| rs3730886  | 0.120219494 | 0.51       | (0.21-1.19)             |
| rs17256107 | 0.123984479 | 0.85       | (0.69-1.05)             |
| rs1805335  | 0.125978952 | 1.19       | (0.95-1.48)             |
| rs7103375  | 0.149351161 | 1.23       | (0.93-1.63)             |
| rs17497014 | 0.154495813 | 1.17       | (0.94-1.45)             |
| rs3136166  | 0.16747197  | 1.17       | (0.94-1.47)             |
| rs254942   | 0.168242073 | 0.58       | (0.26-1.26)             |
| rs11078676 | 0.18192073  | 1.16       | (0.93-1.44)             |
| rs976631   | 0.182937442 | 1.15       | (0.93-1.42)             |
| rs12888332 | 0.183826032 | 0.70       | (0.41-1.19)             |
| rs1799800  | 0.188065817 | 1.17       | (0.93-1.48)             |
| rs2894054  | 0.188242836 | 0.76       | (0.51-1.14)             |
| rs1038144  | 0.192040118 | 0.78       | (0.54-1.13)             |
| rs1685404  | 0.194295878 | 1.16       | (0.93-1.46)             |
| rs1803541  | 0.194585231 | 1.43       | (0.83-2.43)             |
| rs12551155 | 0.195913288 | 0.86       | (0.68-1.08)             |
| rs3731087  | 0.196928555 | 1.62       | (0.78-3.36)             |
| rs3136203  | 0.211565073 | 0.63       | (0.30-1.30)             |

|            |             |      |             |
|------------|-------------|------|-------------|
| rs4151223  | 0.214314481 | 1.15 | (0.92-1.44) |
| rs1952404  | 0.214353526 | 0.52 | (0.19-1.46) |
| rs4151150  | 0.214815993 | 0.52 | (0.19-1.46) |
| rs1800975  | 0.232773279 | 1.15 | (0.92-1.44) |
| rs4151330  | 0.234439567 | 0.87 | (0.69-1.09) |
| rs4134815  | 0.236440795 | 0.84 | (0.62-1.13) |
| rs744154   | 0.236720258 | 1.15 | (0.91-1.45) |
| rs4790830  | 0.241088299 | 1.14 | (0.92-1.42) |
| rs4151289  | 0.249828701 | 0.84 | (0.62-1.13) |
| rs12894381 | 0.261383371 | 0.84 | (0.63-1.13) |
| rs2271026  | 0.272657179 | 0.76 | (0.47-1.24) |
| rs2502604  | 0.278354129 | 0.89 | (0.73-1.10) |
| rs4150484  | 0.27977079  | 1.53 | (0.71-3.33) |
| rs11612479 | 0.280197465 | 1.13 | (0.91-1.41) |
| rs2972381  | 0.282741322 | 1.13 | (0.90-1.42) |
| rs34584424 | 0.28848334  | 1.44 | (0.73-2.85) |
| rs17655    | 0.289730318 | 1.15 | (0.88-1.51) |
| rs9901624  | 0.291700908 | 1.19 | (0.86-1.63) |
| rs17563175 | 0.299336285 | 1.15 | (0.88-1.49) |
| rs3810366  | 0.300651178 | 1.13 | (0.90-1.41) |
| rs1047768  | 0.305125802 | 0.89 | (0.70-1.12) |
| rs4838524  | 0.30695902  | 0.84 | (0.60-1.17) |
| rs4151225  | 0.309293515 | 0.79 | (0.49-1.25) |
| rs7726671  | 0.316104962 | 0.88 | (0.69-1.13) |
| rs3136122  | 0.316563815 | 1.27 | (0.79-2.04) |
| rs12525665 | 0.324507622 | 0.88 | (0.68-1.13) |
| rs11971467 | 0.331571122 | 0.89 | (0.71-1.12) |
| rs10819689 | 0.340828454 | 0.88 | (0.68-1.14) |
| rs11247752 | 0.3462352   | 0.89 | (0.71-1.13) |
| rs2275586  | 0.348084704 | 1.54 | (0.63-3.77) |
| rs12702675 | 0.353456897 | 0.90 | (0.71-1.13) |
| rs3731151  | 0.358517778 | 1.12 | (0.88-1.42) |
| rs4150403  | 0.361671204 | 0.76 | (0.42-1.37) |
| rs3731078  | 0.368576506 | 1.30 | (0.73-2.31) |
| rs754948   | 0.369400474 | 0.77 | (0.43-1.36) |
| rs2266690  | 0.382888862 | 0.89 | (0.69-1.15) |
| rs4150437  | 0.387211731 | 0.81 | (0.51-1.30) |
| rs4150339  | 0.388340019 | 0.78 | (0.44-1.37) |
| rs6673627  | 0.397421948 | 0.88 | (0.64-1.19) |
| rs13181    | 0.39746728  | 1.10 | (0.88-1.37) |
| rs2160138  | 0.407668051 | 0.91 | (0.74-1.13) |
| rs2013867  | 0.40801206  | 1.10 | (0.87-1.39) |

|            |             |      |             |
|------------|-------------|------|-------------|
| rs3731068  | 0.412855153 | 1.12 | (0.85-1.48) |
| rs20579    | 0.416242627 | 0.87 | (0.63-1.21) |
| rs12889598 | 0.418819664 | 0.89 | (0.68-1.18) |
| rs1805330  | 0.420546717 | 1.17 | (0.80-1.73) |
| rs6463746  | 0.421578813 | 0.91 | (0.73-1.14) |
| rs4150386  | 0.425700248 | 0.88 | (0.65-1.20) |
| rs6974910  | 0.427041897 | 0.90 | (0.69-1.17) |
| rs3731081  | 0.433053    | 1.10 | (0.87-1.40) |
| rs2351273  | 0.435022318 | 0.82 | (0.49-1.36) |
| rs17562267 | 0.460585287 | 1.11 | (0.84-1.47) |
| rs3793556  | 0.461801373 | 0.92 | (0.74-1.14) |
| rs732052   | 0.461833224 | 0.90 | (0.69-1.18) |
| rs3136141  | 0.472715356 | 1.42 | (0.54-3.71) |
| rs17332991 | 0.474721085 | 0.88 | (0.62-1.25) |
| rs4567413  | 0.487904659 | 0.92 | (0.74-1.16) |
| rs893919   | 0.488068903 | 0.89 | (0.63-1.25) |
| rs1350344  | 0.489478546 | 1.08 | (0.87-1.33) |
| rs8065937  | 0.491041388 | 1.10 | (0.84-1.45) |
| rs4917772  | 0.497467357 | 0.92 | (0.73-1.17) |
| rs10952075 | 0.505160557 | 0.93 | (0.75-1.15) |
| rs2291120  | 0.522172113 | 1.11 | (0.81-1.52) |
| rs10979808 | 0.525506686 | 0.89 | (0.63-1.27) |
| rs3093821  | 0.527775452 | 1.30 | (0.57-2.96) |
| rs3731015  | 0.528958846 | 1.34 | (0.54-3.32) |
| rs3793786  | 0.529964315 | 0.93 | (0.74-1.17) |
| rs5030755  | 0.531924347 | 0.90 | (0.64-1.26) |
| rs4534184  | 0.533831609 | 0.90 | (0.63-1.27) |
| rs4150563  | 0.534117952 | 0.92 | (0.71-1.19) |
| rs11558955 | 0.542470165 | 0.84 | (0.47-1.49) |
| rs12727    | 0.54617057  | 0.92 | (0.70-1.20) |
| rs13436    | 0.54619982  | 0.94 | (0.76-1.16) |
| rs10255802 | 0.546631804 | 0.93 | (0.74-1.18) |
| rs4151154  | 0.549435021 | 0.81 | (0.40-1.62) |
| rs2228528  | 0.553499914 | 0.92 | (0.70-1.21) |
| rs13241138 | 0.557840879 | 1.07 | (0.86-1.32) |
| rs3740526  | 0.558237233 | 0.94 | (0.76-1.16) |
| rs4150416  | 0.566925614 | 1.12 | (0.77-1.63) |
| rs11974817 | 0.579005683 | 1.06 | (0.86-1.31) |
| rs2336219  | 0.585922317 | 1.09 | (0.80-1.48) |
| rs4151276  | 0.58706293  | 0.78 | (0.32-1.91) |
| rs758994   | 0.592437356 | 1.06 | (0.85-1.33) |
| rs11656253 | 0.596241109 | 0.94 | (0.76-1.17) |

|            |             |      |             |
|------------|-------------|------|-------------|
| rs3729512  | 0.602439942 | 0.92 | (0.66-1.27) |
| rs3212948  | 0.604177846 | 1.06 | (0.85-1.33) |
| rs2957873  | 0.608847385 | 1.08 | (0.81-1.43) |
| rs13340445 | 0.615404121 | 1.07 | (0.83-1.37) |
| rs1799787  | 0.618381998 | 1.06 | (0.84-1.33) |
| rs6463745  | 0.622119186 | 1.06 | (0.85-1.32) |
| rs4151342  | 0.624649152 | 0.90 | (0.60-1.36) |
| rs12360068 | 0.626854205 | 0.89 | (0.55-1.43) |
| rs2972357  | 0.627543365 | 0.94 | (0.75-1.19) |
| rs4150261  | 0.631244902 | 0.80 | (0.32-2.00) |
| rs2974755  | 0.632984141 | 1.05 | (0.85-1.31) |
| rs156641   | 0.637947399 | 1.05 | (0.85-1.31) |
| rs3810945  | 0.6413214   | 0.91 | (0.60-1.37) |
| rs4150336  | 0.646143688 | 1.11 | (0.70-1.76) |
| rs6947203  | 0.650886747 | 0.95 | (0.75-1.20) |
| rs1558476  | 0.661226277 | 0.95 | (0.75-1.20) |
| rs7915501  | 0.67709851  | 0.94 | (0.72-1.24) |
| rs3786136  | 0.682010684 | 1.06 | (0.82-1.37) |
| rs4150342  | 0.698435492 | 1.16 | (0.55-2.43) |
| rs9653966  | 0.700151718 | 1.08 | (0.73-1.60) |
| rs3212955  | 0.708436485 | 1.05 | (0.82-1.34) |
| rs3744768  | 0.711581685 | 1.05 | (0.80-1.38) |
| rs6416887  | 0.711807667 | 1.07 | (0.73-1.57) |
| rs4134813  | 0.716675878 | 0.96 | (0.77-1.20) |
| rs3212986  | 0.722177059 | 1.05 | (0.82-1.34) |
| rs4150581  | 0.722840927 | 0.96 | (0.78-1.18) |
| rs6956254  | 0.723056804 | 0.96 | (0.77-1.20) |
| rs3786133  | 0.724831742 | 0.96 | (0.78-1.19) |
| rs750723   | 0.725428155 | 0.94 | (0.65-1.35) |
| rs2230356  | 0.730903432 | 1.06 | (0.76-1.49) |
| rs3136036  | 0.732888796 | 0.90 | (0.50-1.63) |
| rs2268414  | 0.746324064 | 1.08 | (0.67-1.74) |
| rs3731095  | 0.748758024 | 0.90 | (0.47-1.73) |
| rs3916855  | 0.753684325 | 0.94 | (0.62-1.41) |
| rs17139209 | 0.755415965 | 0.93 | (0.59-1.47) |
| rs1800067  | 0.761559406 | 1.06 | (0.72-1.56) |
| rs4725048  | 0.768939518 | 0.96 | (0.75-1.23) |
| rs238404   | 0.783482076 | 0.97 | (0.78-1.21) |
| rs6598919  | 0.786667869 | 0.97 | (0.79-1.19) |
| rs1800124  | 0.790389941 | 1.10 | (0.55-2.21) |
| rs4150650  | 0.793791232 | 1.03 | (0.82-1.29) |
| rs2348769  | 0.795562344 | 0.97 | (0.76-1.23) |

|            |             |      |             |
|------------|-------------|------|-------------|
| rs4270868  | 0.797619285 | 0.97 | (0.77-1.22) |
| rs12702665 | 0.799337913 | 0.97 | (0.74-1.27) |
| rs238415   | 0.801434985 | 0.97 | (0.78-1.21) |
| rs50872    | 0.804181419 | 0.97 | (0.76-1.24) |
| rs10816790 | 0.804924158 | 1.03 | (0.81-1.32) |
| rs6678050  | 0.807213718 | 1.03 | (0.83-1.28) |
| rs4150474  | 0.808829949 | 0.96 | (0.67-1.37) |
| rs4150454  | 0.816963459 | 1.03 | (0.80-1.32) |
| rs4150479  | 0.817125992 | 1.07 | (0.60-1.93) |
| rs1264308  | 0.819836131 | 1.04 | (0.74-1.46) |
| rs7893335  | 0.820998515 | 0.97 | (0.73-1.29) |
| rs4140805  | 0.825272907 | 1.02 | (0.82-1.28) |
| rs4253211  | 0.82935322  | 0.96 | (0.68-1.36) |
| rs4640     | 0.830062211 | 1.07 | (0.59-1.94) |
| rs50871    | 0.831974657 | 1.02 | (0.83-1.25) |
| rs4978787  | 0.837113353 | 0.98 | (0.79-1.21) |
| rs3731143  | 0.850413751 | 0.96 | (0.61-1.51) |
| rs3136171  | 0.856900701 | 0.94 | (0.45-1.93) |
| rs10244745 | 0.858928073 | 1.03 | (0.77-1.38) |
| rs12656449 | 0.859168516 | 0.97 | (0.67-1.39) |
| rs536132   | 0.859393349 | 0.98 | (0.79-1.21) |
| rs556596   | 0.864813982 | 0.98 | (0.78-1.23) |
| rs17549396 | 0.867465904 | 1.04 | (0.62-1.75) |
| rs4150400  | 0.869224892 | 1.10 | (0.34-3.63) |
| rs4790838  | 0.873604649 | 1.02 | (0.81-1.29) |
| rs4151361  | 0.876007039 | 1.06 | (0.51-2.20) |
| rs274869   | 0.878204002 | 0.98 | (0.79-1.22) |
| rs12197370 | 0.880491032 | 0.98 | (0.79-1.22) |
| rs7778555  | 0.881483256 | 0.98 | (0.79-1.23) |
| rs1047769  | 0.883082096 | 0.96 | (0.59-1.57) |
| rs7812102  | 0.883468016 | 0.97 | (0.68-1.39) |
| rs746418   | 0.888953186 | 1.02 | (0.82-1.25) |
| rs2018836  | 0.893572973 | 0.98 | (0.78-1.24) |
| rs4150383  | 0.894871063 | 0.98 | (0.73-1.32) |
| rs156640   | 0.903063075 | 0.99 | (0.80-1.22) |
| rs3919526  | 0.903307299 | 1.02 | (0.78-1.32) |
| rs3212965  | 0.905079089 | 0.96 | (0.47-1.94) |
| rs4987068  | 0.909062506 | 1.04 | (0.49-2.22) |
| rs11763763 | 0.915143931 | 0.98 | (0.70-1.37) |
| rs3731062  | 0.918263616 | 1.03 | (0.56-1.91) |
| rs2229090  | 0.921494643 | 0.99 | (0.76-1.28) |
| rs3093792  | 0.921857871 | 1.03 | (0.54-1.96) |

|            |             |      |             |
|------------|-------------|------|-------------|
| rs1805334  | 0.92290334  | 0.99 | (0.77-1.27) |
| rs20580    | 0.924768684 | 0.99 | (0.80-1.23) |
| rs3130780  | 0.927413942 | 0.99 | (0.77-1.27) |
| rs13099160 | 0.93437195  | 0.98 | (0.64-1.52) |
| rs794084   | 0.936380959 | 1.01 | (0.81-1.26) |
| rs7780564  | 0.946382114 | 1.01 | (0.81-1.25) |
| rs3793561  | 0.946848547 | 0.99 | (0.79-1.24) |
| rs1805329  | 0.953342087 | 1.01 | (0.77-1.32) |
| rs2227869  | 0.953682824 | 1.02 | (0.60-1.71) |
| rs732855   | 0.967717355 | 1.00 | (0.81-1.25) |
| rs9651726  | 0.978377698 | 1.00 | (0.72-1.40) |
| rs3730878  | 0.980447679 | 0.99 | (0.44-2.23) |
| rs2159832  | 0.981919025 | 1.01 | (0.64-1.59) |
| rs3738948  | 0.985233573 | 1.00 | (0.76-1.32) |
| rs3731099  | 0.986034563 | 1.01 | (0.51-1.99) |
| rs3136066  | 0.986173067 | 1.00 | (0.58-1.75) |

Results are based on a conditional logistic regression using the additive model and adjusting for the first three principle components, and baseline age, education, body mass index, and smoking
